# Supplementary material
Source: publisher figshare collection journal article supplement (https://diabetesjournals.figshare.com/ndownloader/files/29032317)

| Supplementary Table 1. Cohort summary                                                                                                                                                                                                                                                                                           |                                                                                                                       |                                                                                                                                                                                                         |                                                                                                                                                                                                               |                                                                                                                                                                             |
|---------------------------------------------------------------------------------------------------------------------------------------------------------------------------------------------------------------------------------------------------------------------------------------------------------------------------------|-----------------------------------------------------------------------------------------------------------------------|---------------------------------------------------------------------------------------------------------------------------------------------------------------------------------------------------------|---------------------------------------------------------------------------------------------------------------------------------------------------------------------------------------------------------------|-----------------------------------------------------------------------------------------------------------------------------------------------------------------------------|
|                                                                                                                                                                                                                                                                                                                                 | ARIC                                                                                                                  | MESA                                                                                                                                                                                                    | JHS <sup>a</sup>                                                                                                                                                                                              | FHS-Offspring                                                                                                                                                               |
| Original baseline exam                                                                                                                                                                                                                                                                                                          | 1987-1989                                                                                                             | 2000-2002                                                                                                                                                                                               | 2000-2002                                                                                                                                                                                                     | 1971 - 1975                                                                                                                                                                 |
| Original baseline age                                                                                                                                                                                                                                                                                                           | 45-64                                                                                                                 | 45-84                                                                                                                                                                                                   | 21-84                                                                                                                                                                                                         | 5 - 70                                                                                                                                                                      |
| Original sample size                                                                                                                                                                                                                                                                                                            | 15,792                                                                                                                | 6,814                                                                                                                                                                                                   | 5,302                                                                                                                                                                                                         | 4,095                                                                                                                                                                       |
| Baseline exam in the current study                                                                                                                                                                                                                                                                                              | 1990-1992 (Exam 2)                                                                                                    | 2002-2004 (Exam 2)                                                                                                                                                                                      | 2000-2002 (Exam 1)                                                                                                                                                                                            | 1998-2001 (Exam 7)                                                                                                                                                          |
| Median/maximal follow-up years in the current study                                                                                                                                                                                                                                                                             | 24.3/26.9 years                                                                                                       | 12.6/13.8 years                                                                                                                                                                                         | 14.0/17.4 years                                                                                                                                                                                               | 11.8/13.3 years                                                                                                                                                             |
| Race/ethnicity                                                                                                                                                                                                                                                                                                                  | White<br>Black                                                                                                        | White<br>Black<br>Hispanic<br>Asian                                                                                                                                                                     | Black                                                                                                                                                                                                         | White                                                                                                                                                                       |
| Center locations                                                                                                                                                                                                                                                                                                                | MD, NC,<br>MS, MN                                                                                                     | MN, IL, MD,<br>NY, NC, CA                                                                                                                                                                               | Jackson, MS                                                                                                                                                                                                   | Framingham, MA                                                                                                                                                              |
| Manual of operation for event criteria and definition                                                                                                                                                                                                                                                                           | <a href="https://sites.csc.unc.edu/aric/surveillance-manuals">https://sites.csc.unc.edu/aric/surveillance-manuals</a> | <a href="https://www.mesa-nhlbi.org/PublicDocs/MesaMOO/MESA%20Clinical%20Events%20MOP%20(6.22.18).pdf">https://www.mesa-nhlbi.org/PublicDocs/MesaMOO/MESA%20Clinical%20Events%20MOP%20(6.22.18).pdf</a> | <a href="https://www.jacksonheartstudy.org/Research/Study-Design/Forms-Manuals/Events-Surveillance-Forms">https://www.jacksonheartstudy.org/Research/Study-Design/Forms-Manuals/Events-Surveillance-Forms</a> | <a href="https://framinghamheartstudy.org/files/2019/05/MO-Endpoint-Review-v2.0-msp.pdf">https://framinghamheartstudy.org/files/2019/05/MO-Endpoint-Review-v2.0-msp.pdf</a> |
| <p>a. In the current study, participants from both JHS and ARIC were excluded from the JHS cohort with the ARIC exam used instead as their baseline.</p> <p>Abbreviation: ARIC = Atherosclerosis Risk In Communities; FHS = Framingham Heart Study; JHS = Jackson Heart Study; MESA = Multi-Ethnic Study of Atherosclerosis</p> |                                                                                                                       |                                                                                                                                                                                                         |                                                                                                                                                                                                               |                                                                                                                                                                             |

| Supplementary Table 2. Hazard ratios for ASCVD events by DM/CVD groups (using DM-/CVD- as reference).                                                                                                                                                                                                                                                                                                                                                                                                                                                                                          |                  |                                |                    |
|------------------------------------------------------------------------------------------------------------------------------------------------------------------------------------------------------------------------------------------------------------------------------------------------------------------------------------------------------------------------------------------------------------------------------------------------------------------------------------------------------------------------------------------------------------------------------------------------|------------------|--------------------------------|--------------------|
|                                                                                                                                                                                                                                                                                                                                                                                                                                                                                                                                                                                                | Unadjusted HR    | Age, sex and race adjusted HRs | Fully adjusted HRs |
| DM-/CVD-                                                                                                                                                                                                                                                                                                                                                                                                                                                                                                                                                                                       | Ref              | Ref                            | Ref                |
| DM+/CVD-                                                                                                                                                                                                                                                                                                                                                                                                                                                                                                                                                                                       | 2.47 (2.28-2.67) | 2.26 (2.09-2.45)               | 1.84 (1.69-2.00)   |
| DM-/CVD+                                                                                                                                                                                                                                                                                                                                                                                                                                                                                                                                                                                       | 4.01 (3.71-4.33) | 3.00 (2.77-3.26)               | 2.43 (2.23-2.65)   |
| DM+/CVD+                                                                                                                                                                                                                                                                                                                                                                                                                                                                                                                                                                                       | 7.42 (6.76-8.15) | 5.12 (4.64-5.65)               | 3.42 (3.08-3.80)   |
| <p>All HRs had p &lt;0.0001.</p> <p>Fully adjusted HRs were adjusted for age, sex, race, family history of CVD, education, smoking, alcohol use, SBP, BMI, triglycerides, HDL-C, hs-CRP, serum creatinine, lipid lowering medication, hypertension medication, and other two DM/CVD groups.</p> <p>Abbreviation: ASCVD = atherosclerotic cardiovascular disease; BMI = body mass index; CVD = cardiovascular disease; DM = diabetes mellitus; HDL-C = high density lipoprotein cholesterol; HR = hazard ratio; hs-CRP =high sensitivity C-reactive protein; SBP = systolic blood pressure.</p> |                  |                                |                    |

| Supplementary Table 3. Hazard ratios for ASCVD events comparing DM severity group vs. DM-/CVD+                                                                                                                                                                                                                                                                                                                                                                                                                                                                                                                                        |                               |                                       |                                        |
|---------------------------------------------------------------------------------------------------------------------------------------------------------------------------------------------------------------------------------------------------------------------------------------------------------------------------------------------------------------------------------------------------------------------------------------------------------------------------------------------------------------------------------------------------------------------------------------------------------------------------------------|-------------------------------|---------------------------------------|----------------------------------------|
|                                                                                                                                                                                                                                                                                                                                                                                                                                                                                                                                                                                                                                       | Unadjusted HR (95%CI)         | Age, sex and race adjusted HR (95%CI) | Fully adjusted HR (95%CI) <sup>a</sup> |
| Overall DM+/CVD- vs. DM-/CVD+                                                                                                                                                                                                                                                                                                                                                                                                                                                                                                                                                                                                         | 0.62 (0.56-0.68) <sup>‡</sup> | 0.75 (0.68-0.83) <sup>‡</sup>         | 0.76 (0.69-0.84) <sup>†</sup>          |
| DM duration subgroups vs DM-/CVD+                                                                                                                                                                                                                                                                                                                                                                                                                                                                                                                                                                                                     |                               |                                       |                                        |
| Newly diagnosed DM                                                                                                                                                                                                                                                                                                                                                                                                                                                                                                                                                                                                                    | 0.45 (0.39-0.52) <sup>‡</sup> | 0.57 (0.49-0.66) <sup>‡</sup>         | 0.57 (0.49-0.67) <sup>‡</sup>          |
| DM duration 1 - <10 years                                                                                                                                                                                                                                                                                                                                                                                                                                                                                                                                                                                                             | 0.64 (0.57-0.72) <sup>‡</sup> | 0.79 (0.70-0.88) <sup>‡</sup>         | 0.79 (0.70-0.89) <sup>†</sup>          |
| DM duration 10+ years                                                                                                                                                                                                                                                                                                                                                                                                                                                                                                                                                                                                                 | 0.90 (0.77-1.06)              | 1.01 (0.87-1.19)                      | 1.01 (0.86-1.19)                       |
| HbA1c subgroups vs DM-/CVD+                                                                                                                                                                                                                                                                                                                                                                                                                                                                                                                                                                                                           |                               |                                       |                                        |
| HbA1c < 7%                                                                                                                                                                                                                                                                                                                                                                                                                                                                                                                                                                                                                            | 0.50 (0.44-0.56) <sup>‡</sup> | 0.60 (0.53-0.67) <sup>‡</sup>         | 0.62 (0.55-0.70) <sup>‡</sup>          |
| HbA1c 7% - < 9%                                                                                                                                                                                                                                                                                                                                                                                                                                                                                                                                                                                                                       | 0.65 (0.56-0.74) <sup>‡</sup> | 0.79 (0.68-0.91) <sup>*</sup>         | 0.77 (0.66-0.89) <sup>†</sup>          |
| HbA1c ≥ 9%                                                                                                                                                                                                                                                                                                                                                                                                                                                                                                                                                                                                                            | 1.01 (0.87-1.18)              | 1.44 (1.23-1.68) <sup>‡</sup>         | 1.40 (1.20-1.64) <sup>‡</sup>          |
| DM medication use subgroups vs DM-/CVD+                                                                                                                                                                                                                                                                                                                                                                                                                                                                                                                                                                                               |                               |                                       |                                        |
| Not on DM medication                                                                                                                                                                                                                                                                                                                                                                                                                                                                                                                                                                                                                  | 0.51 (0.46-0.58) <sup>‡</sup> | 0.64 (0.57-0.72) <sup>‡</sup>         | 0.65 (0.58-0.73) <sup>‡</sup>          |
| On DM medication                                                                                                                                                                                                                                                                                                                                                                                                                                                                                                                                                                                                                      | 0.77 (0.69-0.86) <sup>‡</sup> | 0.91 (0.81-1.03)                      | 0.91 (0.81-1.03)                       |
| <p>a. Fully adjusted HRs were adjusted for age, sex, race, family history of CVD, education, smoking, alcohol use, SBP, BMI, triglycerides, HDL-C, hs-CRP, serum creatinine, lipid lowering medication, hypertension medication, and other two DM/CVD groups.</p> <p>*p&lt;0.01, †p&lt;0.001, ‡p&lt;0.0001</p> <p>Abbreviation: ASCVD = atherosclerotic cardiovascular disease; BMI = body mass index; CVD = cardiovascular disease; DM = diabetes mellitus; HbA1c = Hemoglobin A1c; HDL-C = high density lipoprotein cholesterol; HR = hazard ratio; hs-CRP =high sensitivity C-reactive protein; SBP = systolic blood pressure.</p> |                               |                                       |                                        |

| Supplementary Table 4. ASCVD events hazard ratios of DM+/CVD- vs. DM-/CVD+ in subgroups                                                                                                                                                                                                                                            |                                         |                               |                              |
|------------------------------------------------------------------------------------------------------------------------------------------------------------------------------------------------------------------------------------------------------------------------------------------------------------------------------------|-----------------------------------------|-------------------------------|------------------------------|
| Subgroup                                                                                                                                                                                                                                                                                                                           |                                         | HR (95% CI)                   | P value for interaction test |
| Sex                                                                                                                                                                                                                                                                                                                                | Female                                  | 0.91 (0.78-1.05)              | 0.091                        |
|                                                                                                                                                                                                                                                                                                                                    | Male                                    | 0.66 (0.58-0.76) <sup>†</sup> |                              |
| Race                                                                                                                                                                                                                                                                                                                               | White                                   | 0.72 (0.63-0.82) <sup>†</sup> | 0.175                        |
|                                                                                                                                                                                                                                                                                                                                    | Black                                   | 0.87 (0.73-1.04)              |                              |
|                                                                                                                                                                                                                                                                                                                                    | Other races                             | 0.72 (0.30-1.71)              |                              |
| Age groups                                                                                                                                                                                                                                                                                                                         | Age < 55 years                          | 0.88 (0.70-1.11)              | <0.0001                      |
|                                                                                                                                                                                                                                                                                                                                    | Age 55 - <65 years                      | 0.64 (0.55-0.75) <sup>†</sup> |                              |
|                                                                                                                                                                                                                                                                                                                                    | Age ≥ 65 years                          | 0.66 (0.55-0.78) <sup>†</sup> |                              |
| Triglyceride groups                                                                                                                                                                                                                                                                                                                | Triglycerides < 2.26 mmol/L             | 0.70 (0.63-0.79) <sup>†</sup> | 0.002                        |
|                                                                                                                                                                                                                                                                                                                                    | Triglycerides ≥ 2.26 mmol/L             | 0.98 (0.78-1.23)              |                              |
| hs-CRP groups                                                                                                                                                                                                                                                                                                                      | hs-CRP < 2 mg/L                         | 0.69 (0.58-0.82) <sup>†</sup> | 0.035                        |
|                                                                                                                                                                                                                                                                                                                                    | hs-CRP ≥ 2 mg/L                         | 0.80 (0.71-0.90) <sup>*</sup> |                              |
| Chronic kidney disease                                                                                                                                                                                                                                                                                                             | eGFR ≥ 90 mL/min/1.73m <sup>2</sup>     | 0.67 (0.43-1.04)              | 0.056                        |
|                                                                                                                                                                                                                                                                                                                                    | eGFR 60 - <90 mL/min/1.73m <sup>2</sup> | 0.71 (0.62-0.82) <sup>†</sup> |                              |
|                                                                                                                                                                                                                                                                                                                                    | eGFR < 60 mL/min/1.73m <sup>2</sup>     | 0.76 (0.65-0.89) <sup>*</sup> |                              |
| HRs were adjusted for age, sex, race, family history of CVD, education, smoking, alcohol use, SBP, BMI, triglycerides, HDL-C, hs-CRP, serum creatinine, lipid lowering medication, hypertension medication, and other two DM/CVD groups.                                                                                           |                                         |                               |                              |
| *p<0.001, †p<0.0001                                                                                                                                                                                                                                                                                                                |                                         |                               |                              |
| Abbreviation: ASCVD = atherosclerotic cardiovascular disease; BMI = body mass index; CVD = cardiovascular disease; DM = diabetes mellitus; eGFR = estimated glomular filtration rate; HDL-C = high density lipoprotein cholesterol; HR = hazard ratio; hs-CRP =high sensitivity C-reactive protein; SBP = systolic blood pressure. |                                         |                               |                              |

Supplementary Table 5. Hazard ratios of DM+/CVD- vs. DM-/CVD+ in subgroups (with non-significant interaction test)

|                       |     | HR (95% CI)                   |                               |
|-----------------------|-----|-------------------------------|-------------------------------|
|                       |     | CVD events                    | ASCVD events                  |
| Family history of CVD | No  | 0.80 (0.71-0.89) <sup>§</sup> | 0.74 (0.64-0.86) <sup>‡</sup> |
|                       | Yes | 0.90 (0.81-1.00) <sup>*</sup> | 0.75 (0.66-0.86) <sup>§</sup> |
| Current smoker        | No  | 0.63 (0.57-0.70) <sup>§</sup> | 0.54 (0.48-0.62) <sup>§</sup> |
|                       | Yes | 0.67 (0.55-0.80) <sup>§</sup> | 0.53 (0.42-0.67) <sup>§</sup> |
| Hypertension          | No  | 0.83 (0.73-0.96) <sup>†</sup> | 0.78 (0.65-0.94) <sup>†</sup> |
|                       | Yes | 0.92 (0.84-1.01)              | 0.81 (0.72-0.92) <sup>‡</sup> |
| Obesity               | No  | 0.83 (0.75-0.92) <sup>‡</sup> | 0.73 (0.64-0.84) <sup>§</sup> |
|                       | Yes | 0.92 (0.82-1.04)              | 0.80 (0.68-0.94) <sup>†</sup> |
| Low HDL-C             | No  | 0.80 (0.72-0.89) <sup>§</sup> | 0.74 (0.64-0.85) <sup>§</sup> |
|                       | Yes | 0.92 (0.83-1.03)              | 0.77 (0.67-0.88) <sup>‡</sup> |

HRs were adjusted for age, sex, race, family history of CVD, education, smoking, alcohol use, SBP, BMI, triglycerides, HDL-C, hs-CRP, serum creatinine, lipid lowering medication, hypertension medication, and other two DM/CVD groups.

\*p<0.05, †p<0.01, ‡p<0.001, §p<0.0001

Abbreviation: ASCVD = atherosclerotic cardiovascular disease; BMI = body mass index; CVD = cardiovascular disease; DM = diabetes mellitus; eGFR = estimated glomerular filtration rate; HDL-C = high density lipoprotein cholesterol; HR = hazard ratio; hs-CRP = high sensitivity C-reactive protein; SBP = systolic blood pressure.

Supplementary Table 6. Individual example on whether one with DM has CVD risk equivalent DM: The example is a 60-year old white male. He has a triglyceride of 2.03 mmol/L, hs-CRP of 2.0mg/L, eGFR of 68 mL/min/1.73m<sup>2</sup>, HbA1c of 8.0% with diabetes medication and a diabetes duration of 3 years.

| Parameter                                                                     | Beta     | X     | X' <sup>a</sup> | Beta*X   | Beta*X' |
|-------------------------------------------------------------------------------|----------|-------|-----------------|----------|---------|
| DM+/CVD- (yes=1, no=0)                                                        | 0.47158  | 1     | 0               | 0.47158  | 0       |
| DM+/CVD- (yes=1, no=0)* age (years)                                           | -0.01578 | 60    | 0               | -0.9468  | 0       |
| DM+/CVD- (yes=1, no=0) * sex (male=1, female=0)                               | -0.87053 | 1     | 0               | -0.87053 | 0       |
| DM+/CVD- (yes=1, no=0) * age (years)*sex (male=1, female=0)                   | 0.01253  | 60    | 0               | 0.7518   | 0       |
| DM+/CVD- (yes=1, no=0) * white (white=1, non-white=0)                         | 0.26969  | 1     | 0               | 0.26969  | 0       |
| DM+/CVD- (yes=1, no=0)* triglycerides (mmol/L)                                | 0.08456  | 2.03  | 0               | 0.17199  | 0       |
| DM+/CVD- (yes=1, no=0)* ln(hs-CRP) (mg/L)                                     | 0.10709  | ln(2) | 0               | 0.07423  | 0       |
| DM+/CVD- (yes=1, no=0)* eGFR (mL/min/1.73m <sup>2</sup> )                     | -0.0076  | 68    | 0               | -0.5168  | 0       |
| Hba1c (%) <sup>b</sup>                                                        | 0.10539  | 8     | 6.5             | 0.84312  | 0.68504 |
| DM duration 1-10 years (yes=1, no=0)                                          | 0.12247  | 1     | 0               | 0.12247  | 0       |
| DM duration 10+ years (yes=1, no=0)                                           | 0.37920  | 0     | 0               | 0        | 0       |
| DM medication (yes=1, no=0)                                                   | 0.19084  | 1     | 0               | 0.19084  | 0       |
| Sum of beta*individual X                                                      |          |       |                 | 0.56159  | 0.68504 |
| Difference of $\Sigma \text{beta} * X$ and $\Sigma \text{beta} * X'$          |          |       |                 | -0.12345 |         |
| Hazard ratio of CVD events for being DM+/CVD- vs. being DM-/CVD+ <sup>c</sup> |          |       |                 | 0.88     |         |

$\Sigma \text{beta} * X - \Sigma \text{beta} * X'$  represents the log risk difference of an DM+/CVD- individual vs. had he/she had DM-/CVD+. In the example, the difference is less than 0, indicating that this person, who had DM but no CVD would have lower CVD risk than the counterfactual scenario had he had no DM but CVD; thus his diabetes should not be considered as CVD risk equivalent.

a. X' is the covariate value if the same subject had no DM but prior CVD

b. if one had actual HbA1c (X)  $\geq 6.5\%$ , corresponding X' for HbA1c is 6.5. if one had actual HbA1c (X) less than 6.5%, corresponding X' for HbA1c is the same as X for HbA1c.

c.  $\text{Hazard ratio} = e^{\Sigma \text{beta} * X - \Sigma \text{beta} * X'}$

Abbreviation: CVD = cardiovascular disease; DM = diabetes mellitus; eGFR = estimated glomerular filtration rate; HbA1c = Hemoglobin A1c; hs-CRP =high sensitivity C-reactive protein.

Supplementary Table 7. Risk factor comparison by the CVD risk equivalent DM condition in those with DM+/CVD-

|                                                                                                                   | Non-CVD risk<br>equivalent DM<br>N=3,036 | CVD risk<br>equivalent DM<br>N=715 | p value |
|-------------------------------------------------------------------------------------------------------------------|------------------------------------------|------------------------------------|---------|
| Age, years                                                                                                        | 60.4 ± 9.3                               | 57.9 ± 7.6                         | <0.0001 |
| Male sex                                                                                                          | 1501 (49.4%)                             | 220 (30.8%)                        | <0.0001 |
| Race                                                                                                              |                                          |                                    | <0.0001 |
| White                                                                                                             | 1248 (41.1%)                             | 430 (60.1%)                        |         |
| Black                                                                                                             | 1380 (45.5%)                             | 261 (36.5%)                        |         |
| Other races                                                                                                       | 408 (13.4%)                              | 24 (3.4%)                          |         |
| Education                                                                                                         |                                          |                                    | 0.0002  |
| Less than high school                                                                                             | 781 (25.7%)                              | 181 (25.3%)                        |         |
| High school graduate                                                                                              | 772 (25.4%)                              | 237 (33.1%)                        |         |
| Above high school                                                                                                 | 721 (23.7%)                              | 136 (19.0%)                        |         |
| Smoking status                                                                                                    |                                          |                                    | 0.005   |
| Never                                                                                                             | 1266 (41.7%)                             | 335 (46.9%)                        |         |
| Prior                                                                                                             | 1305 (43.0%)                             | 260 (36.4%)                        |         |
| Current                                                                                                           | 465 (15.3%)                              | 120 (16.8%)                        |         |
| Alcohol use                                                                                                       | 1341 (44.2%)                             | 260 (36.4%)                        | 0.0001  |
| Family history of CVD                                                                                             | 1276 (42.0%)                             | 367 (51.3%)                        | <0.0001 |
| SBP, mmHg                                                                                                         | 129.3 ± 19.5                             | 130.6 ± 21.2                       | 0.155   |
| DBP, mmHg                                                                                                         | 73.4 ± 10.3                              | 72.0 ± 10.4                        | 0.002   |
| BMI, kg/m <sup>2</sup>                                                                                            | 31.1 ± 6.3                               | 32.9 ± 7.2                         | <0.0001 |
| HbA1c, % (mmol/mol)                                                                                               | 6.9 ± 1.3<br>(52.0 ± 14.2)               | 9.3 ± 2.3<br>(78.0 ± 25.1)         | <0.0001 |
| Fasting glucose, mmol/L                                                                                           | 7.8 ± 2.5                                | 12.4 ± 5.3                         | <0.0001 |
| DM duration, years                                                                                                | 4.6±7.3                                  | 8.7±8.0                            | <0.0001 |
| Total cholesterol, mmol/L                                                                                         | 5.1 ± 1.0                                | 5.6 ± 1.2                          | <0.0001 |
| LDL-C, mmol/L                                                                                                     | 3.2 ± 1.0                                | 3.4 ± 1.1                          | <0.0001 |
| HDL-C, mmol/L                                                                                                     | 1.2 ± 0.4                                | 1.1 ± 0.4                          | <0.0001 |
| Triglycerides, mmol/L                                                                                             | 1.6 ± 0.9                                | 2.7 ± 2.4                          | <0.0001 |
| hs-CRP, mg/L                                                                                                      | 4.9 ± 7.2                                | 10.0 ± 18.5                        | <0.0001 |
| Serum creatinine, µmol/L                                                                                          | 91.8 ± 25.2                              | 106.9 ± 84.2                       | <0.0001 |
| eGFR, mL/min/1.73m <sup>2</sup>                                                                                   | 73.3 ± 18.3                              | 63.6 ± 19.1                        | <0.0001 |
| PCE risk score, %                                                                                                 | 21.6 ± 15.4                              | 19.3 ± 14.8                        | 0.0002  |
| PCE risk score ≥ 20%                                                                                              | 1382 (45.5%)                             | 269 (37.6%)                        | 0.0001  |
| Left ventricle hypertrophy                                                                                        | 116 (3.8%)                               | 36 (5.0%)                          | 0.139   |
| Atrial fibrillation                                                                                               | 13 (0.4%)                                | 5 (0.7%)                           | 0.520   |
| Lipid-lowering medication                                                                                         | 577 (19.0%)                              | 123 (17.2%)                        | 0.266   |
| Hypertension medication                                                                                           | 1720 (56.7%)                             | 426 (59.6%)                        | 0.155   |
| Diabetes medication                                                                                               | 1231 (40.5%)                             | 547 (76.5%)                        | <0.0001 |
| Continuous variables were presented as mean ± SD; categorical variables were presented as frequency (percentage). |                                          |                                    |         |

Abbreviation: BMI = body mass index; CVD = cardiovascular disease; DBP = diastolic blood pressure; DM = diabetes mellitus; eGFR = estimated glomerular filtration rate; HbA1c = Hemoglobin A1c; HDL-C = high density lipoprotein cholesterol; hs-CRP = high sensitivity C-reactive protein; LDL-C = low density lipoprotein cholesterol; PCE = Pooled Cohort Equation; SBP = systolic blood pressure.



Supplementary Figure 1. CVD/ASCVD event rates by baseline DM/CVD status

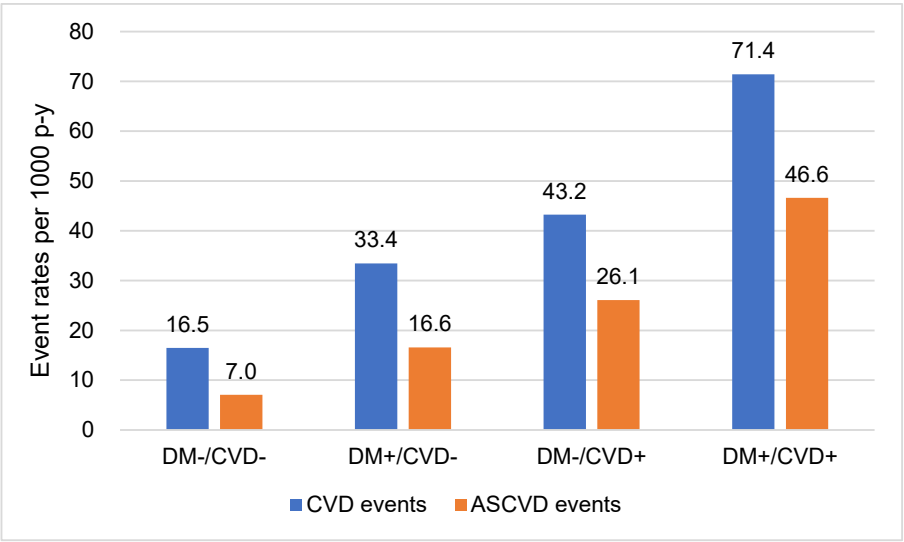

Supplementary Figure 2. Event rates by DM/CVD and cohorts. (A) CVD events;  
(B) ASCVD events

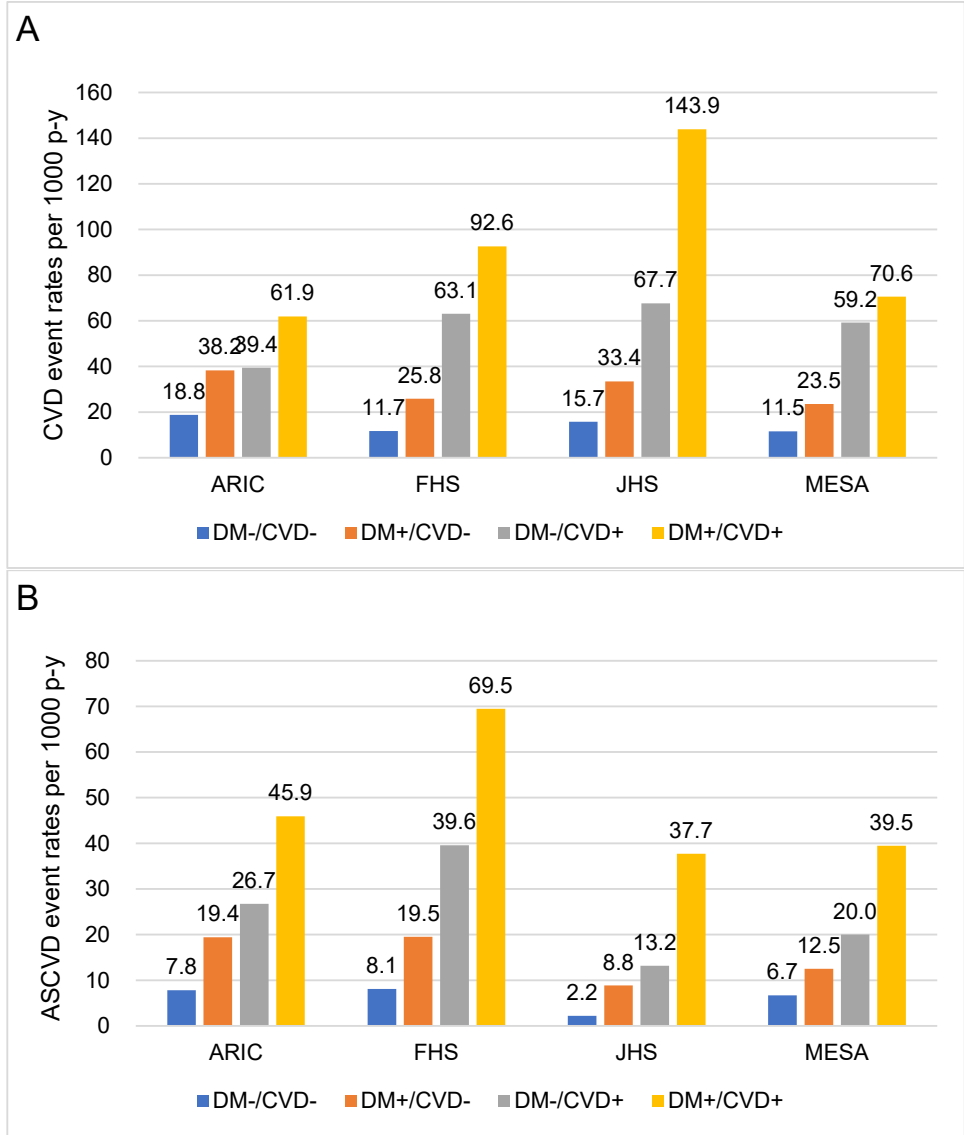

Supplementary Figure 3. Event rates by DM severity groups vs. DM-/CVD+. (A) CVD events; (B) ASCVD events

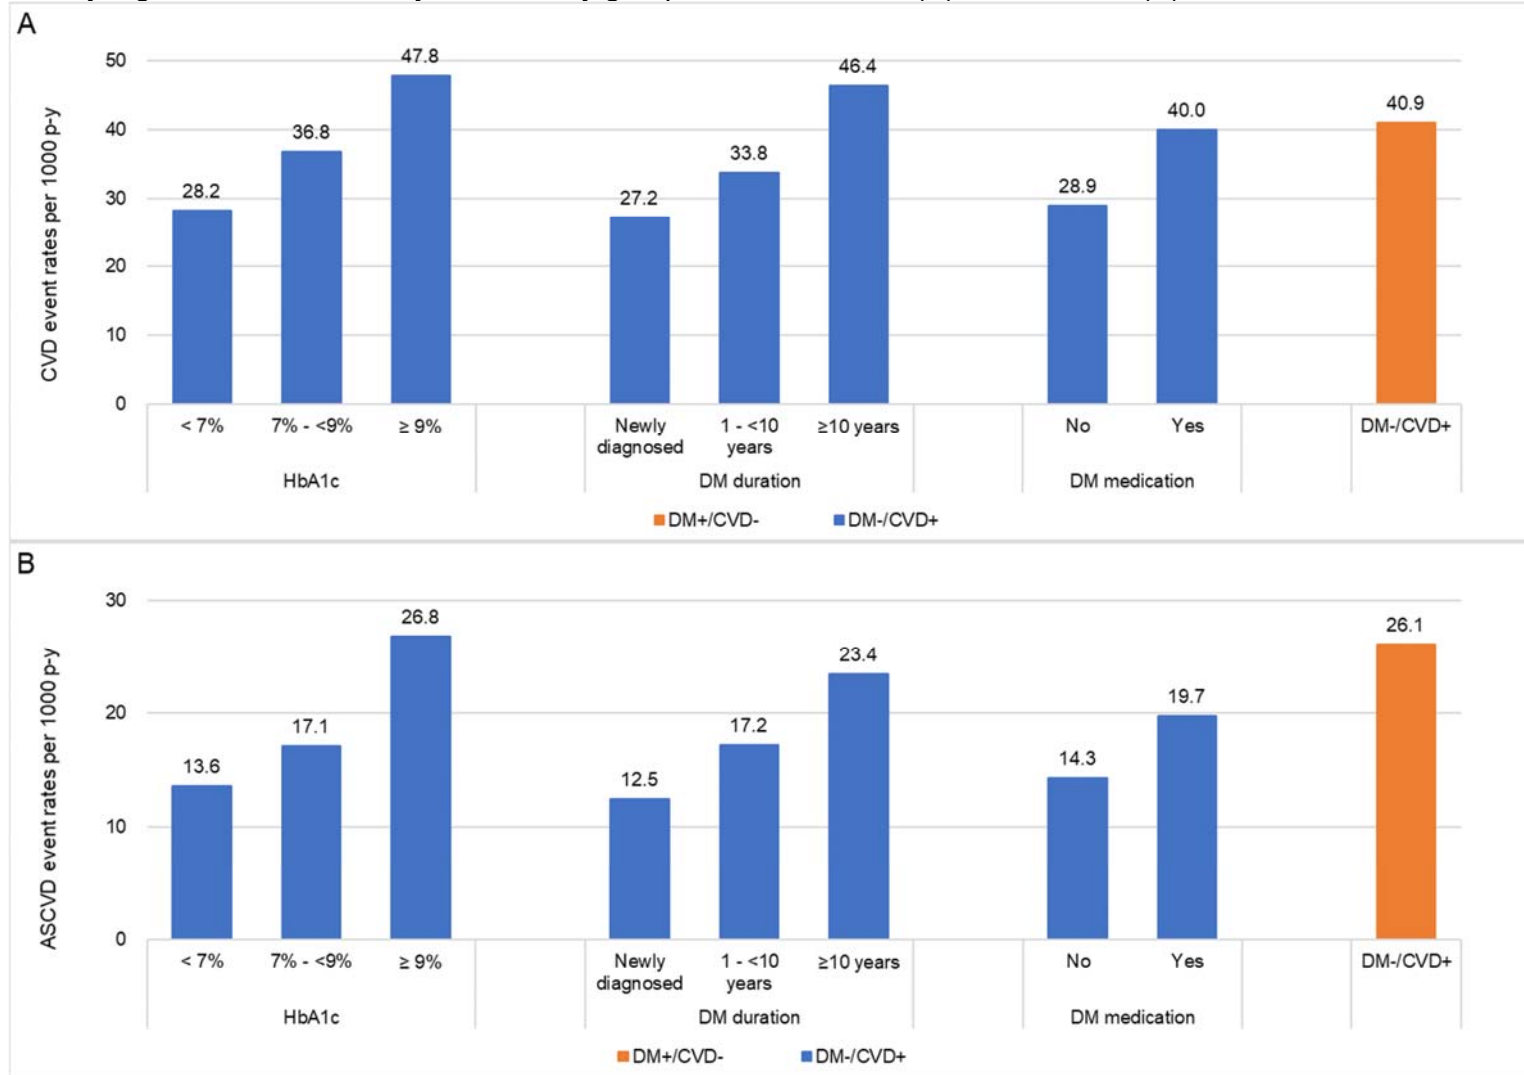

Supplementary Figure 4. Event rates by DM/CVD and sex. (A) CVD events; (B) ASCVD events

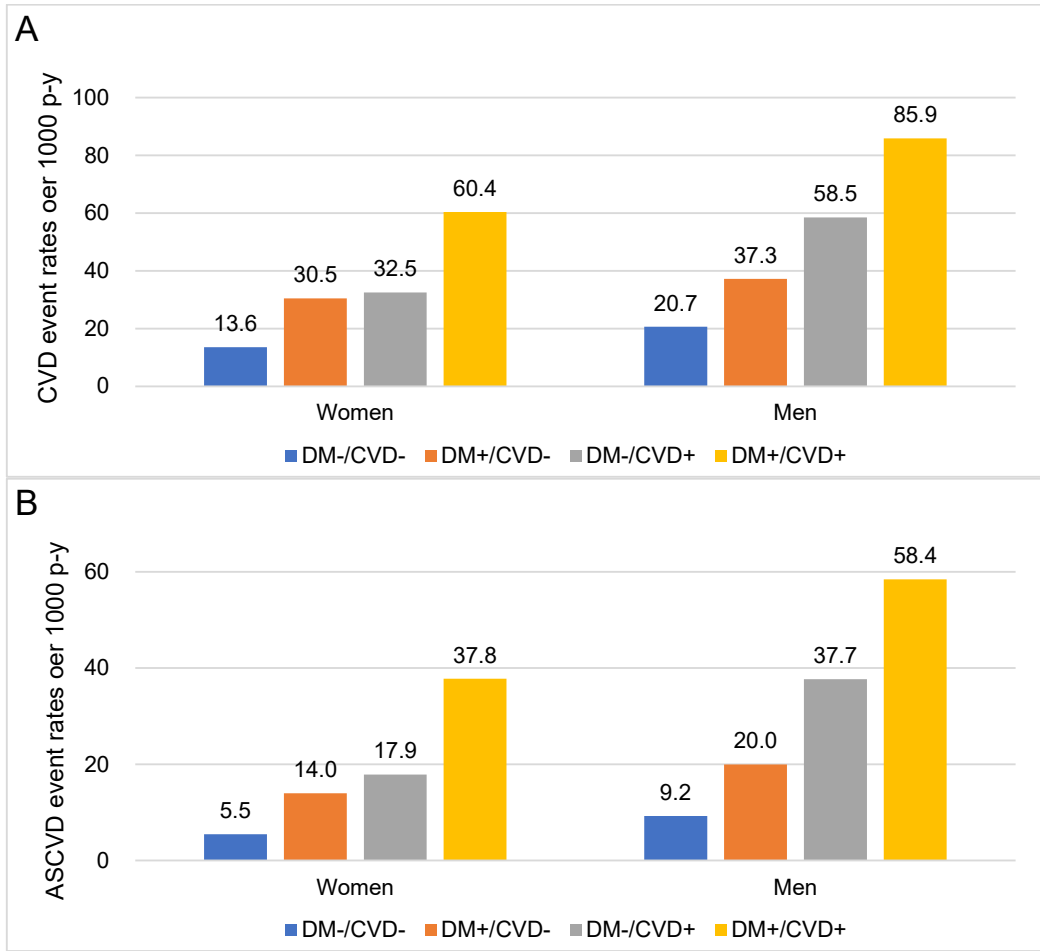

Supplementary Figure 5. Event rates by DM/CVD and race. (A) CVD events; (B) ASCVD events

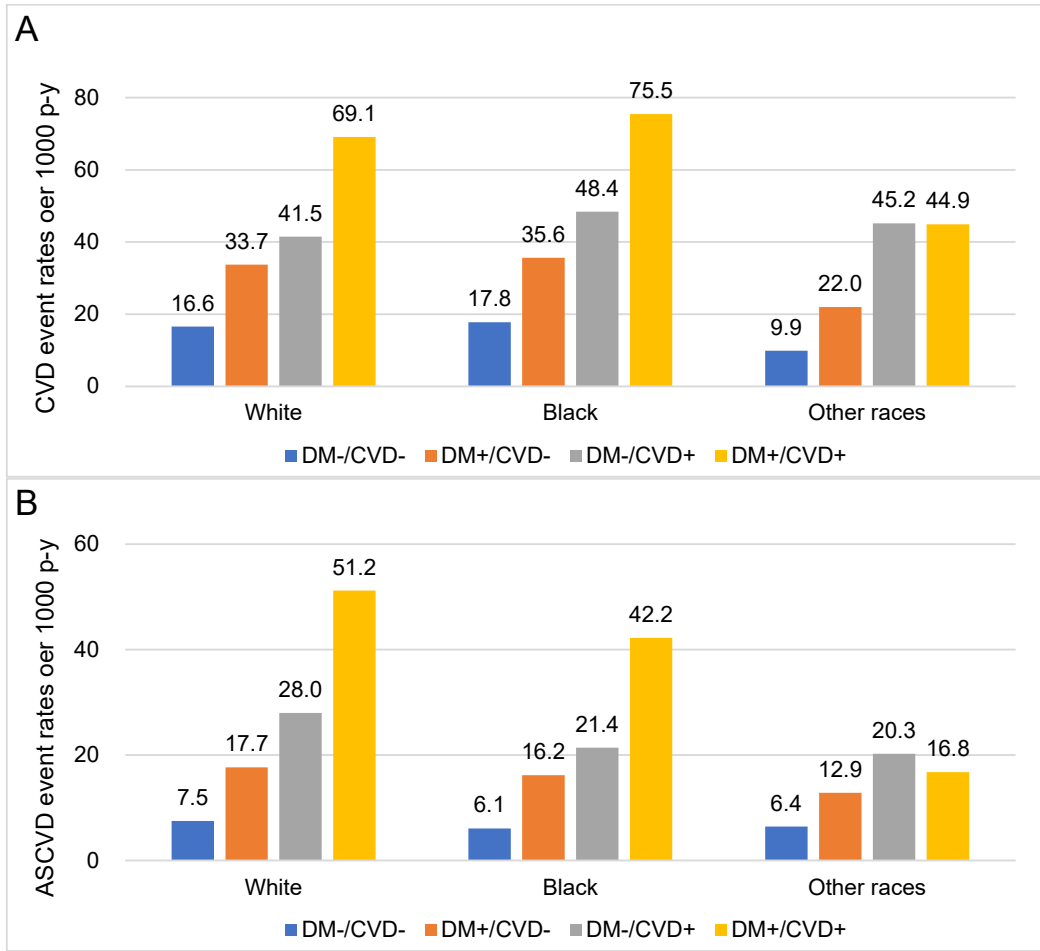

Supplementary Figure 6. Event rates by DM/CVD and age groups. (A) CVD events;  
(B) ASCVD events

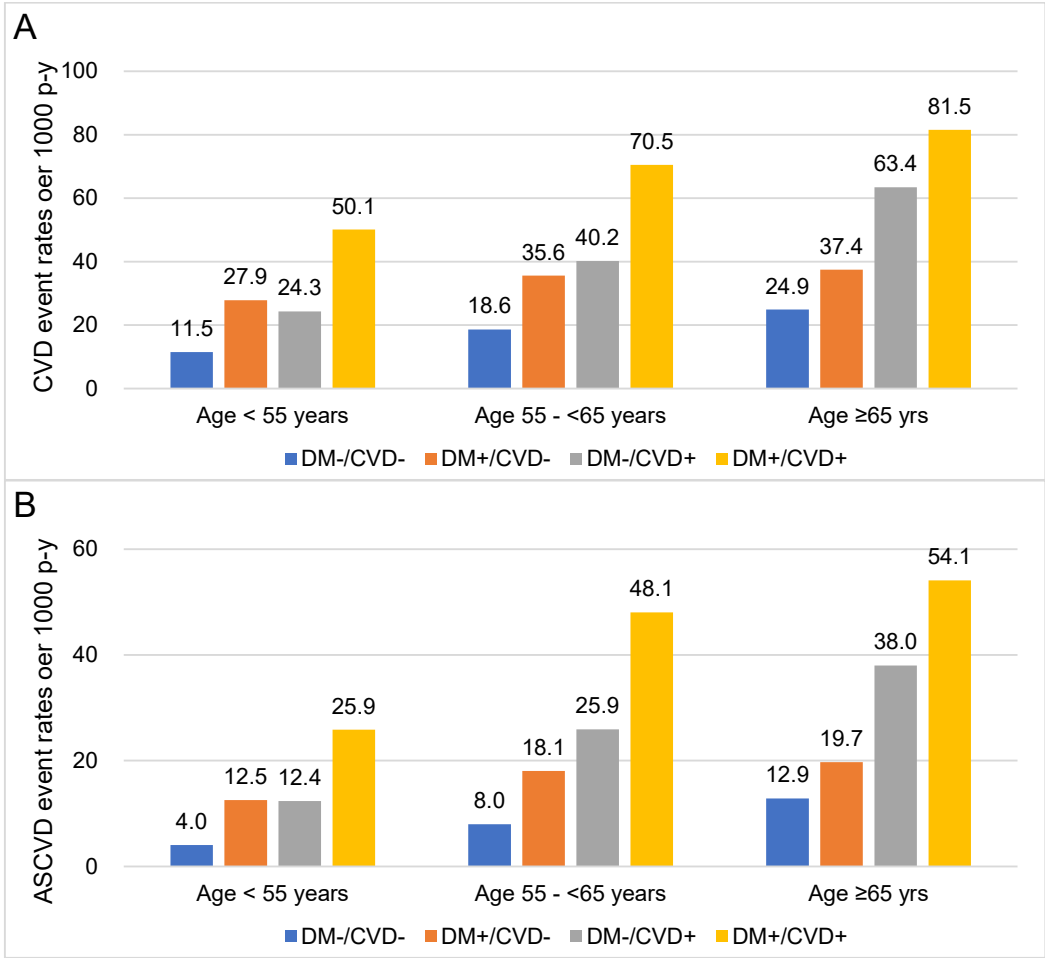

Supplementary Figure 7. Event rates by DM/CVD and triglyceride groups. (A) CVD events; (B) ASCVD events

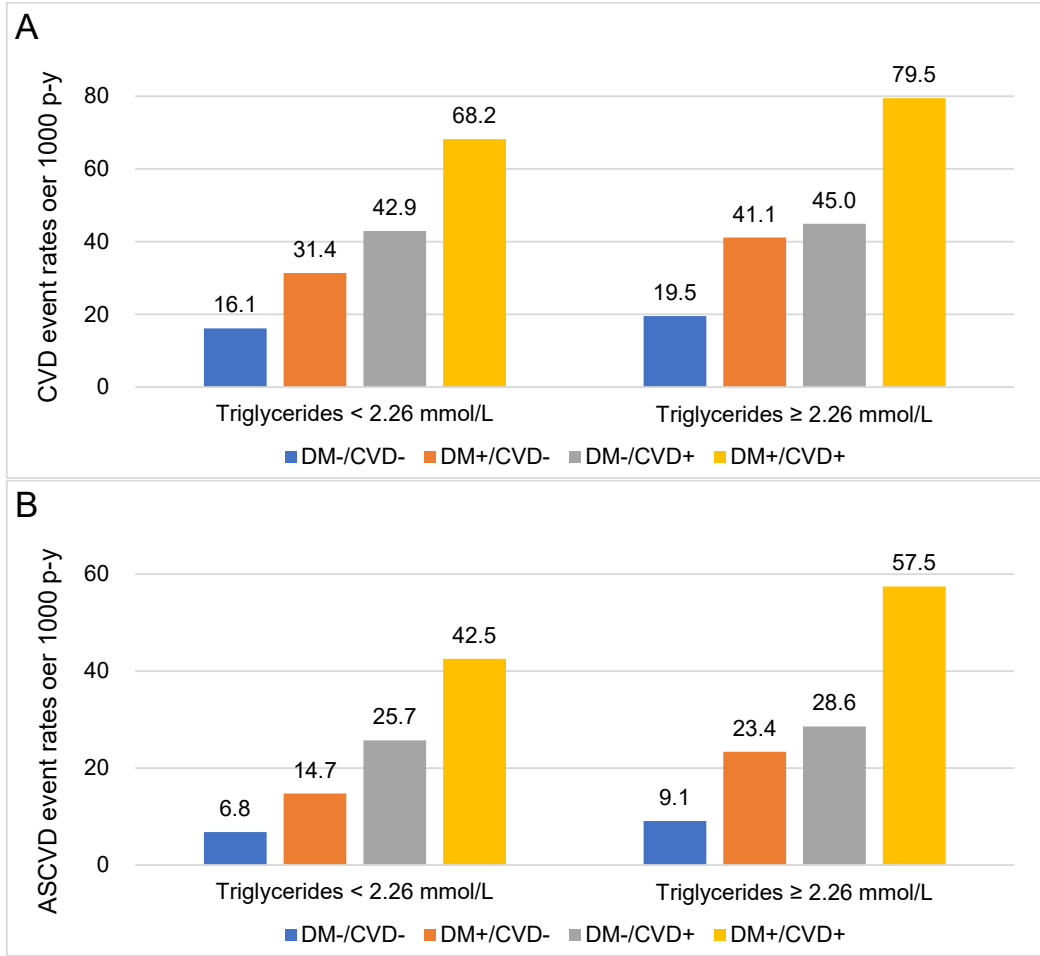

Supplementary Figure 8. Event rates by DM/CVD and hs-CRP groups. (A) CVD events;  
(B) ASCVD events

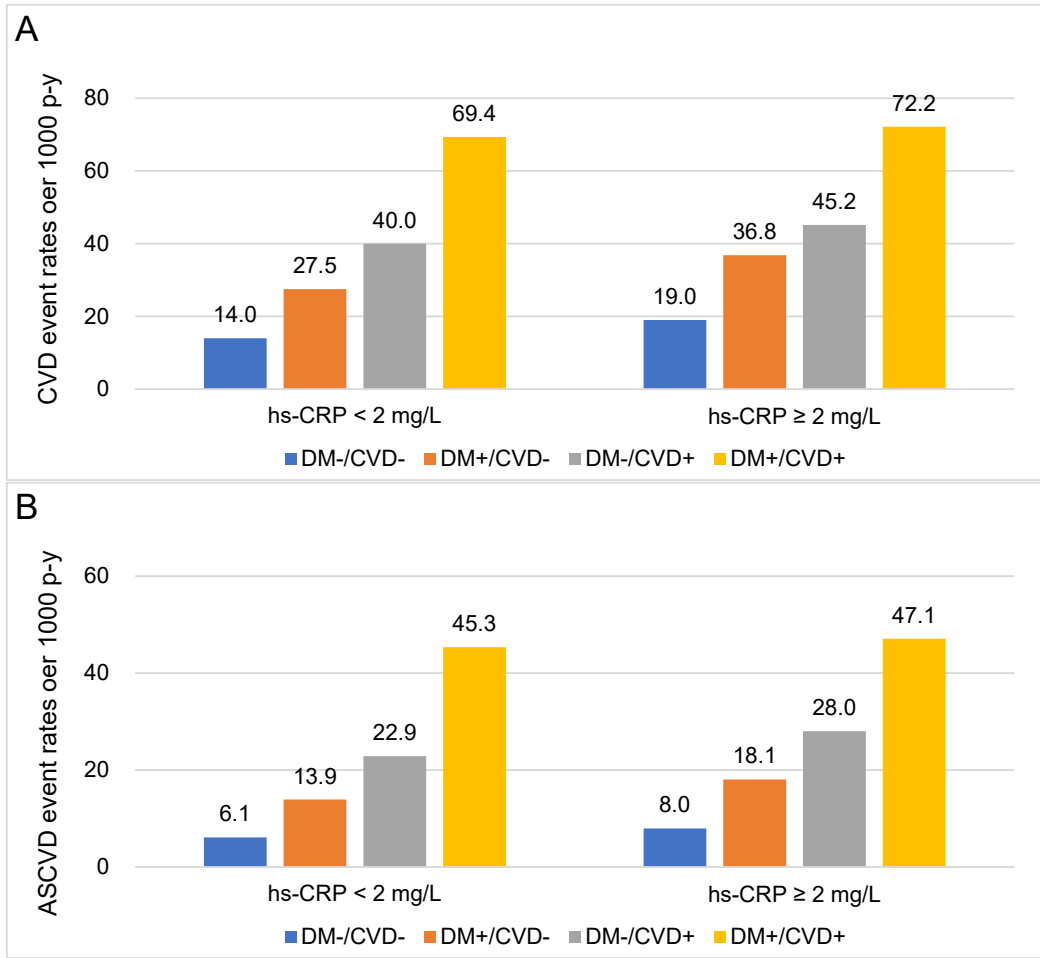



Supplementary Figure 9. Event rates by DM/CVD and CKD groups. (A) CVD events;  
(B) ASCVD events

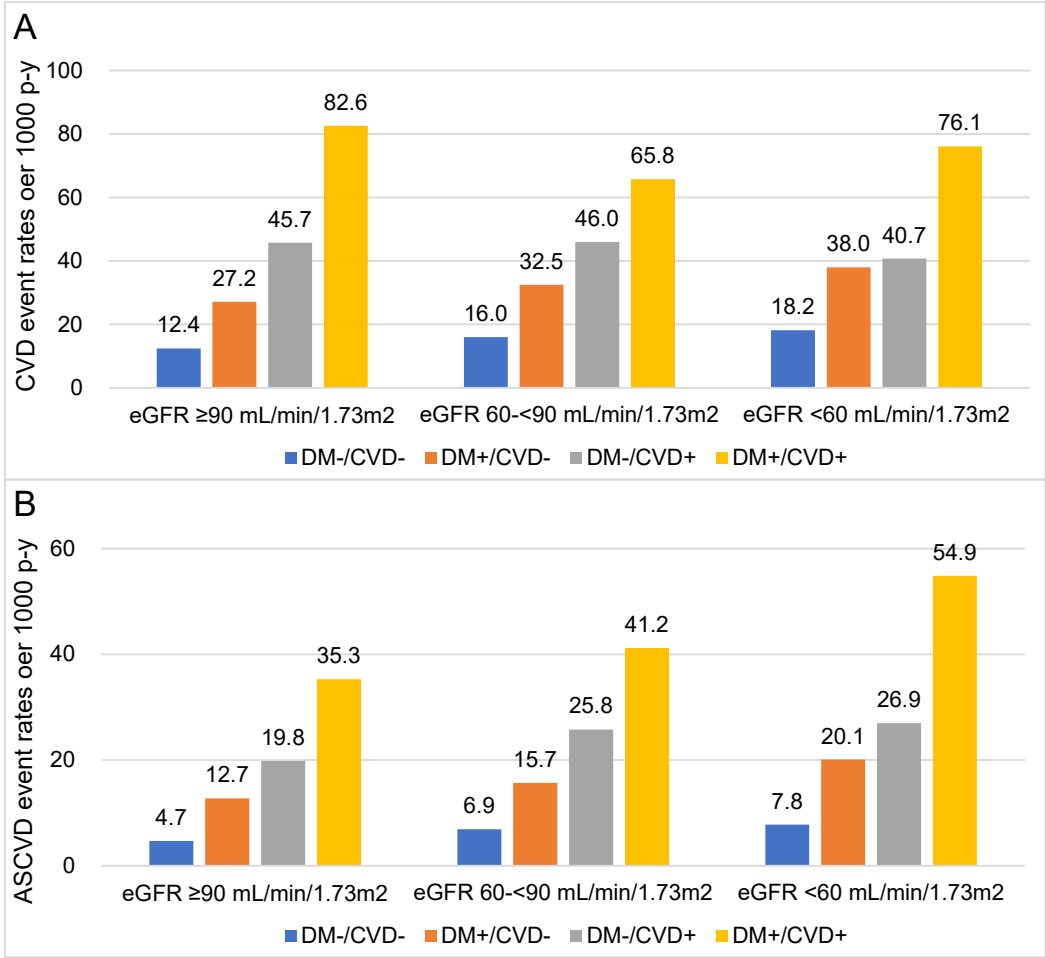

Supplementary Figure 10. Hazard ratios of DM+/CVD- vs. DM-/CVD+ for CVD events in each age, sex and race categories

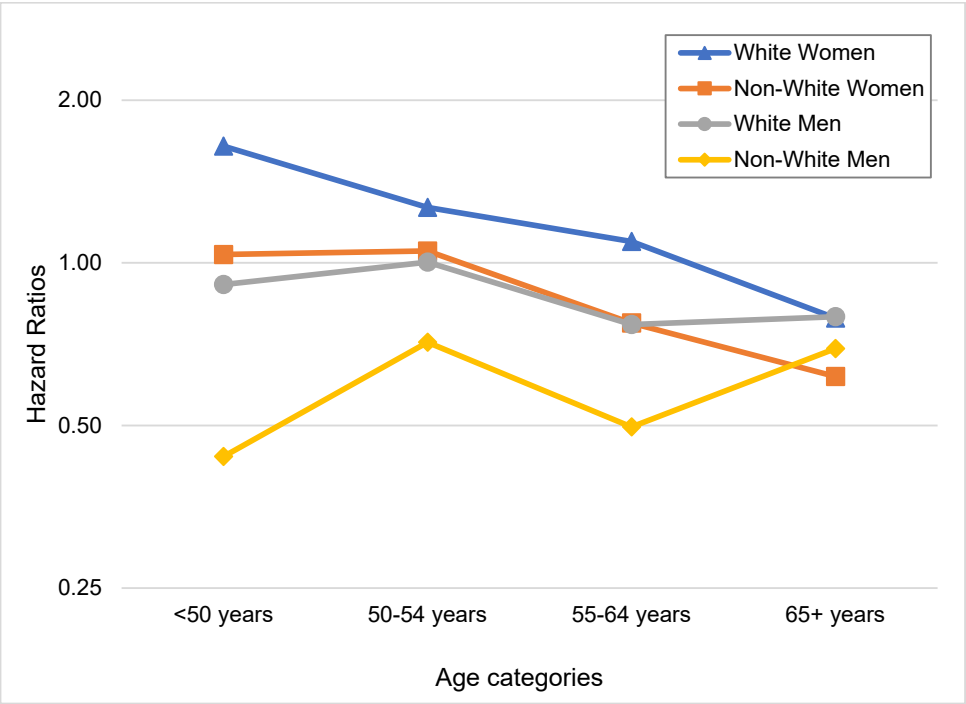

Supplement: Supplementary file 1 [file 29032317]
